# Supplementary material
Source: Springer Nature journal article supplement (https://www.springermedizin.de/resource/supplementary/12936_2012_2132_MOESM1_ESM.pdf/9542618)

# Katanga

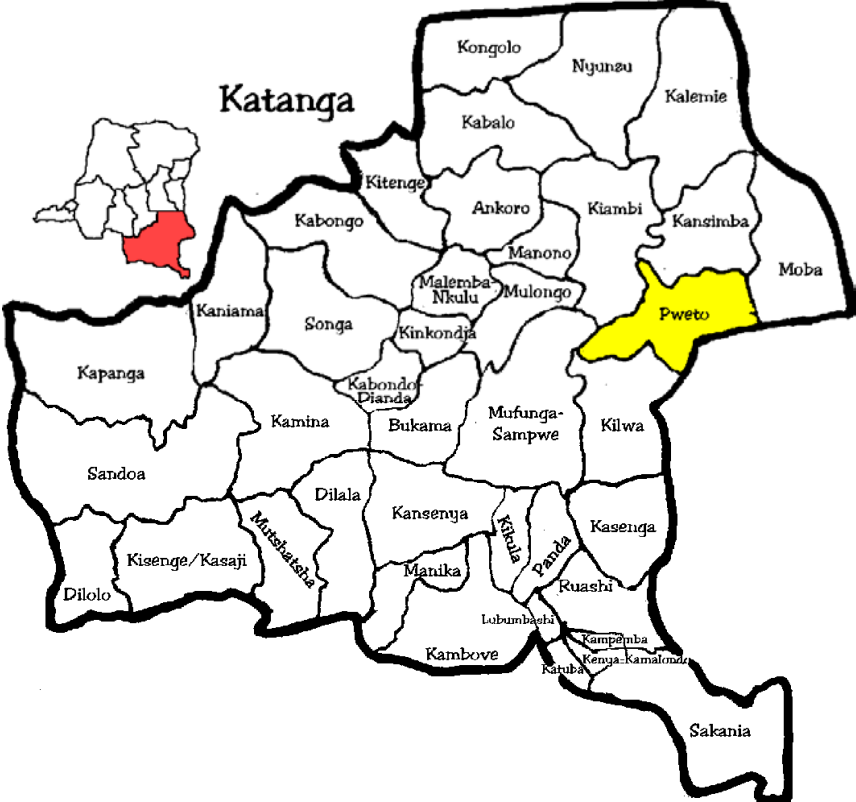

Supplement: MOESM1 [file 9542618]
